# Supplementary material for: Genetic Analysis of Novel Behaviour Traits in Pigs Derived from Social Network Analysis
Source: MDPI journal article supplement (doi:10.3390/genes13040561), 2022-03-23
Supplement: s1 [file s1]

**Table S1.** Spearman rank correlations (confidence interval) among the phenotypic values of the social network traits of aggressive behaviour.

| Trait                  | Closeness centrality | Degree centrality | Eigenvector centrality | Clustering coefficient |
|------------------------|----------------------|-------------------|------------------------|------------------------|
| Betweenness centrality | 0.62 (0.58, 0.66)    | 0.80 (0.78, 0.83) | 0.60 (0.55, 0.63)      | -0.55 (-0.60, -0.51)   |
| Closeness centrality   |                      | 0.85 (0.83, 0.87) | 0.53 (0.48, 0.57)      | -0.05 (-0.10, 0.01)    |
| Degree centrality      |                      |                   | 0.66 (0.62, 0.69)      | -0.14 (-0.20, -0.09)   |
| Eigenvector centrality |                      |                   |                        | -0.10 (-0.14, -0.03)   |

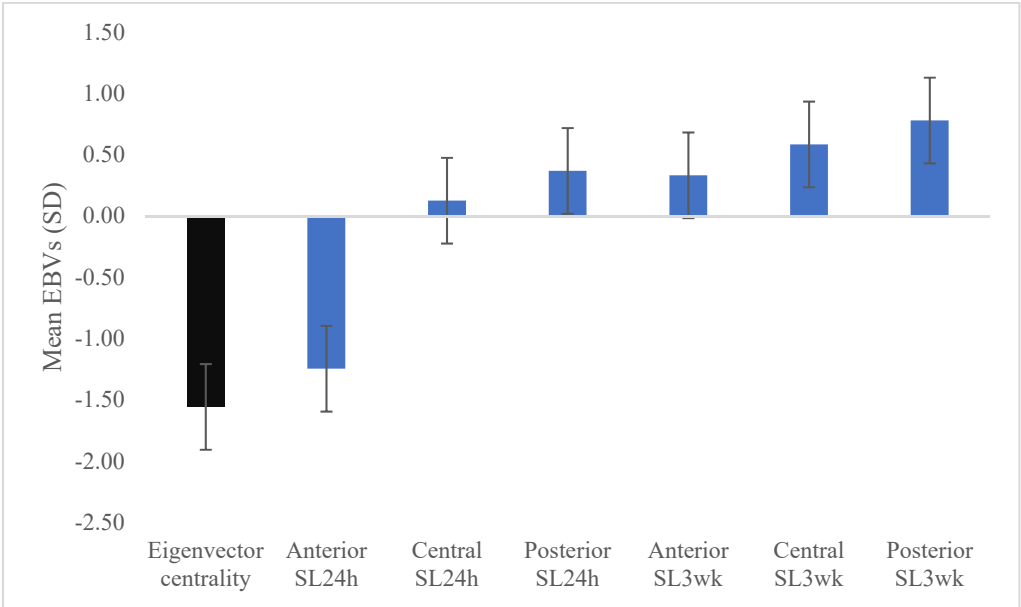

(a)

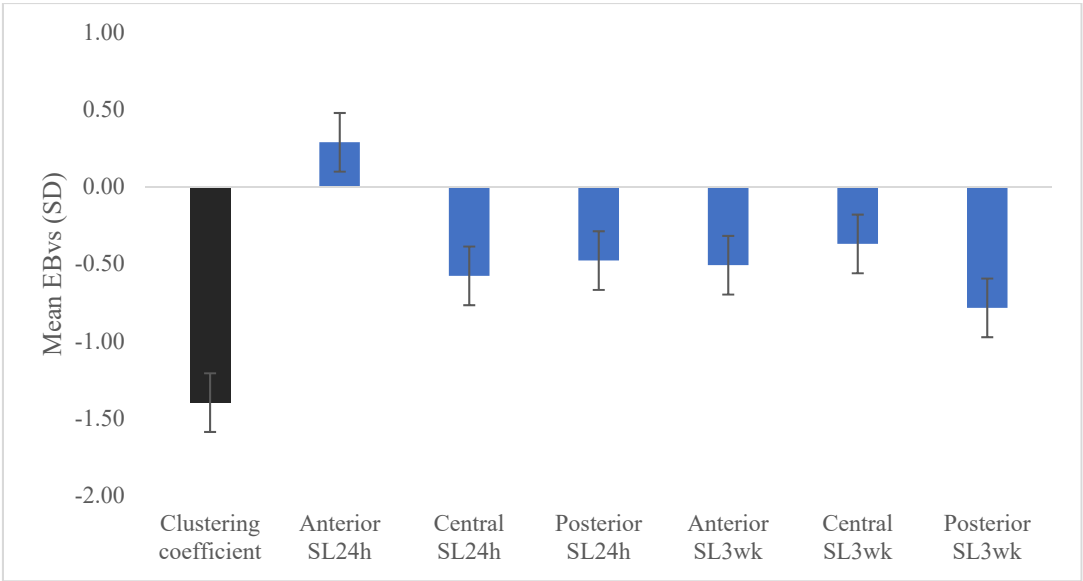

(b)

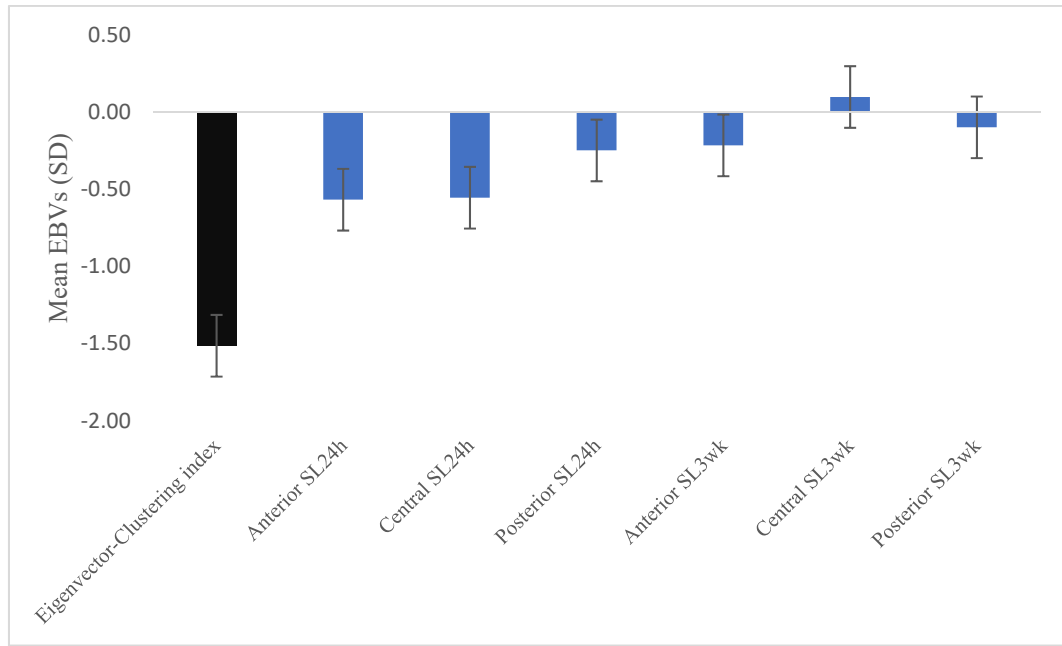

(c)

**Figure S1.** Mean estimated breeding values (EBVs) of skin lesions traits of pigs with the pen level EBVs in the lowest 20% for eigenvector centrality (a), clustering coefficient (b) and Eigenvector-clustering Index (c). The trait that selection was based on is shaded black.
